# Supplementary material for: Enhanced Factor IX Activity following Administration of AAV5-R338L “Padua” Factor IX versus AAV5 WT Human Factor IX in NHPs
Source: PubMed Central journal article supplement — Mol Ther Methods Clin Dev. 2019 Sep 26;15:221–31. doi: 10.1016/j.omtm.2019.09.005 (PMC6834974; doi:10.1016/j.omtm.2019.09.005), 2019-09-26
Supplement: mmc1.pdf [file mmc1.pdf]

**OMTM, Volume 15**

## **Supplemental Information**

### **Enhanced Factor IX Activity following Administration of AAV5-R338L “Padua” Factor IX versus AAV5 WT Human Factor IX in NHPs**

**Elisabeth A. Spronck, Ying Poi Liu, Jacek Lubelski, Erich Ehlert, Sander Gielen, Paula Montenegro-Miranda, Martin de Haan, Bart Nijmeijer, Valerie Ferreira, Harald Petry, and Sander J. van Deventer**

## Supplementary Methods

### *Detection of anti-hFIX Abs*

Antibodies against hFIX were analyzed at different time points during the study. In brief, native hFIX protein was immobilized to the wells of an immunoabsorbent assay plate and blocking reagents were added. Serum, plasma, and control samples were loaded to allow the binding of hFIX-specific immunoglobulins to the immobilized antigen and hFIX-specific bound IgG was detected using HRP conjugated anti-monkey IgG.

### *In silico immunogenicity analyses*

Potential immunogenicity risk of *FIX*-Padua was assessed by performing an *in-silico* analysis.<sup>52,53</sup> The global and regional immunogenic potential was examined using an *in-silico* platform for epitope identification and prediction (EpiMatrix system developed by Epivax, Inc) for both Class I (all nucleated cells) and Class II (antigen presenting cells) HLA and compared to the full-length wild type human *FIX* sequence.

**Supplementary Figure 1. Detection of cynomolgus antibodies against human FIX in AAV-injected NHPs.**

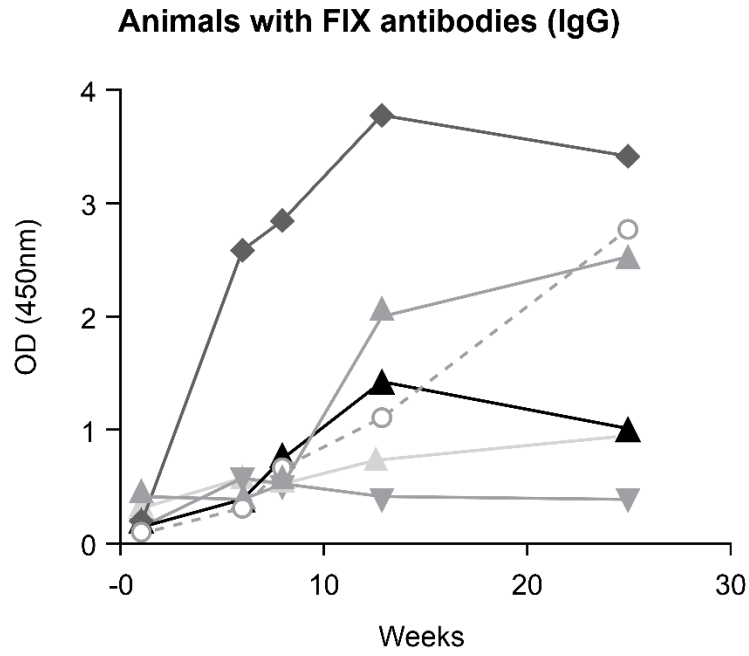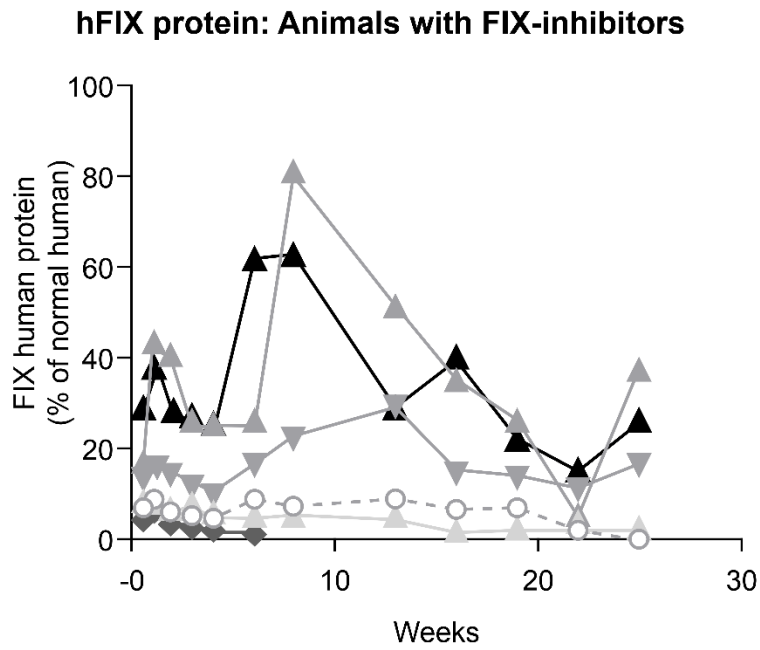

- 844: AMT-060  $5 \times 10^{12}$
- ▲ 847: AMT-061  $5 \times 10^{12}$
- ▲ 851: AMT-061  $2.5 \times 10^{13}$
- ▼ 852: AMT-061  $2.5 \times 10^{13}$
- ◆ 863: AMT-061  $2.5 \times 10^{13}$
- ▲ 856: AMT-061  $9 \times 10^{13}$

**Supplementary Figure 2. Class I and II immunogenicity scoring**

**Class II Immunogenicity Scale**

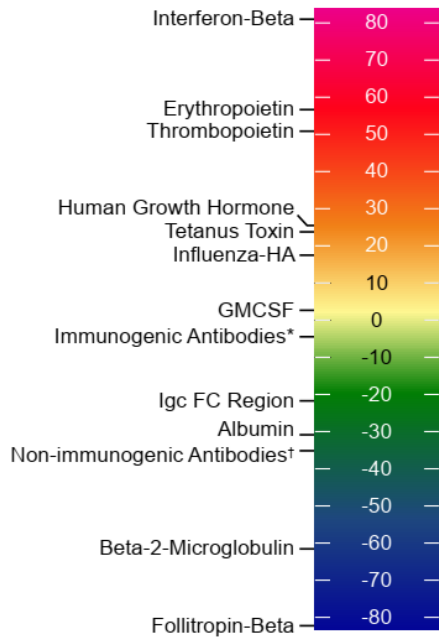

\*ADA in >5% exposed patients  
 †ADA in <5% exposed patients

**Class I:**

| Protein label          | Class I epimatrix score |
|------------------------|-------------------------|
| WT Factor IX, by 9     | 6.11                    |
| Padua Factor IX, by 9  | 7.62                    |
| WT Factor IX, by 10    | 7.81                    |
| Padua Factor IX, by 10 | 9.35                    |

**Class II:**

| Protein label   | Length | Assessments | EpiMatrix hits | EpiMatrix score |
|-----------------|--------|-------------|----------------|-----------------|
| WT Factor IX    | 461    | 4,077       | 170            | -25.49          |
| Padua Factor IX | 461    | 4,077       | 170            | -25.47          |

Padua Factor IX (-25.47)  
 WT Factor IX (-25.49)

*EpiMatrix predicted excess/shortfall in aggregate immunogenicity relative to a random protein standard*
